1 **Running header:** Morphological structure of ant assemblages

2

3 **Morphological structure of ant assemblages in tropical and temperate forests**

4

5

6 Rogério R. Silva<sup>1\*</sup>, Israel Del Toro<sup>2,3</sup>, Carlos Roberto F. Brandão<sup>4</sup> and Aaron M. Ellison<sup>5</sup>

7

8 Affiliations:

9 <sup>1</sup>Museu Paraense Emílio Goeldi, Coordenação de Ciências da Terra e Ecologia, Av. Perimetral 1901,

10 CEP 66077-830, Belém, PA, Brazil

11 <sup>2</sup>Center for Macroecology Evolution and Climate, University of Copenhagen, Copenhagen,

12 Denmark

13 <sup>3</sup>The Jornada Basin Experimental Range, Las Cruces, New Mexico, USA

14 <sup>4</sup>Museu de Zoologia da Universidade de São Paulo, Av. Nazaré 481, CEP 04263-000, São Paulo, SP,

15 Brazil

16 <sup>5</sup>Harvard Forest, 324 North Main St., Petersham, Massachusetts, 01366, USA

17

18 \*Correspondence: Rogério R. Silva, Museu Paraense Emílio Goeldi, Coordenação de Ciências da

19 Terra e Ecologia, Av. Perimetral 1901, CEP 66077-830, Belém, PA, Brazil.

20 E-mail: rogeriorosas@gmail.com

21

22

23 **Word count for abstract: 295**

24 **Word count: 9,122**

25

## 26 **Abstract**

27 Morphological variation in co-occurring species often is used to infer species assembly rules and  
 28 other processes structuring ecological assemblages. We compared the morphological structure of  
 29 ant assemblages in two biogeographic regions along two extensive latitudinal gradients to examine  
 30 common patterns and unique characteristics of trait distribution. We sampled ant assemblages along  
 31 extensive latitudinal gradients in Tropical Atlantic Forest in eastern Brazil and temperate forests in  
 32 the eastern United States. We quantified 14 morphological traits related to the ecology and life  
 33 history of each of 599 ant species and defined the morphological space occupied by different ant  
 34 assemblages. Null models were used to test whether tropical and temperate ant assemblages differed  
 35 from random expectation in morphological structure. Correlations between traits and climate were  
 36 used to infer associations between habitat characteristics and morphological space occupied by ant  
 37 assemblages. Tropical ant assemblages had higher morphological diversity and variation in the  
 38 space of occupied morphospace, whereas temperate assemblages had higher variance in size.  
 39 Although tropical ant assemblages had smaller morphological distances among species, species  
 40 packing (i.e., mean nearest-neighbor distance) did not differ between regions. Null model analysis  
 41 revealed scant evidence of habitat filtering or niche differentiation within assemblages. Different  
 42 traits had different means, variances, skewness, and kurtosis values along each environmental  
 43 gradient. Mean trait values within assemblages were associated mainly with region and correlated  
 44 with temperature but trait variances had more complex responses to climate, including interactions  
 45 between temperature and precipitation in the models. The higher functional diversity in tropical ant  
 46 assemblages occurs by expansion of the morphospace rather than through an increase in species  
 47 packing. Different traits vary independently along environmental gradients. Analysis of individual  
 48 traits together with categorization of the moments of trait distributions (statistical central  
 49 tendencies) provide new directions for quantifying morphological diversity in ant assemblages.

## 50 **Keywords**

51 Ants, Brazilian Atlantic forest, Eastern United States, environmental gradients, Formicidae,  
52 functional traits, morphology, traits.

53

## 54 **Introduction**

55 Contemporary community ecology is strongly focused on functional traits, what constrains  
56 them, and their relationship with environmental variables and community structure (Cadotte et al.  
57 2013, Winemiller et al. 2015). An increasing number of studies suggest that examining functional  
58 traits of individual organisms may help to construct a mechanistic and predictive framework for the  
59 study of species distribution and co-occurrence (Cadotte et al. 2013). Trait diversity, which is  
60 closely related to functional diversity, increasingly has been used as a measure of phenotypic  
61 diversity in species assemblages (McGill et al. 2015). However, few studies have evaluated how  
62 morphological diversity is distributed along extensive latitudinal or environmental gradients,  
63 particularly in highly diverse invertebrate assemblages (Arnan et al. 2014, Yates et al. 2014, Silva  
64 and Brandão 2014). Without such analyses, it remains difficult to identify or test mechanistic  
65 hypotheses regarding the geographic distribution of biodiversity in light of the distribution of  
66 organismal functions (Swenson et al. 2012). A better understanding of the relationships between  
67 traits and geographic or environmental variables also is critical for improving predictions of  
68 functional and composition responses to ongoing global climatic change (Fortunel et al. 2014).

69 The morphospace of an assemblage can be defined as the distribution of morphological trait  
70 values within it (Ricklefs and Travis 1980). Quantifying the volume, overlap, and packing of  
71 morphological trait space generally improves our understanding of how different ecological  
72 processes structure morphological diversity and ecological strategies (Mouillot et al. 2005,  
73 Lamanna et al. 2014). For example, studies of morphological variation have revealed several  
74 interesting patterns in the occupation of niche space (Stevens et al. 2006, Inward et al. 2011,  
75 Ricklefs, 2012), morphological disparity between assemblages (how the variety of body plans

76 within a taxon fills a morphospace) (McClain et al. 2004), responses of assemblage structure to  
 77 habitat complexity (Willis et al. 2005, Montaña and Winemiller, 2010), and convergent or divergent  
 78 patterns of morphology among continents (Ricklefs and Travis 1980, Winemiller 1991, Inward et al.  
 79 2011, Ricklefs 2012, Montaña et al. 2014). Morphological data also have been used to test the  
 80 relative importance of environmental filtering and limiting similarity in structuring species  
 81 assemblages (e.g., Cadotte et al. 2013, 2015).

82 The trait approach may be particularly useful for interpreting patterns of diversity of taxa  
 83 such as arthropods that are hyperdiverse, relatively small in size, and poorly studied. For many  
 84 arthropod groups, morphology of functionally important traits is the most easily obtainable,  
 85 repeatable, and accurately measurable dimension associated with ecological diversity (Pie and  
 86 Traniello 2007, Yates et al. 2014). Among the arthropods, ants are an ideal taxonomic group for  
 87 investigating relationships between morphology, traits, and assemblage structure because they (i)  
 88 are abundant, comprising the dominant fraction of animal biomass in most terrestrial ecosystems  
 89 (Wilson and Hölldobler, 2005), (ii) perform a range of important ecosystems functions (Del Toro et  
 90 al. 2012), (iii) exhibit a very large morphological diversity at very small scales (Silva and Brandão  
 91 2010), and (iv) vary in composition along environmental gradients (Gotelli and Ellison 2002). In  
 92 addition, many studies have shown that ant species have specific traits that are correlated with  
 93 environmental conditions (Wiescher et al. 2012), macro- or microhabitat structure (Kaspari and  
 94 Weiser 1999, Farji-Brener et al. 2004, Gibb and Parr 2010, Yates et al. 2014) and resource  
 95 exploitation (Retana et al. 2015). Finally, recent research with stable isotopes has identified  
 96 evidence of a relationship between ant morphology and their trophic position within food webs  
 97 (Gibb and Cunningham 2013, Gibb et al. 2015b).

98 Here, we present the first broad-scale description of the morphological differentiation of  
 99 functional traits between temperate and tropical ant assemblages. We used three approaches to  
 100 quantify morphological differentiation. First, we used diversity metrics to estimate the amount of

101 morphological space occupied by temperate and tropical ant assemblages. Second, we combined  
102 multivariate statistics and null model analyses to ask whether morphological differentiation within  
103 assemblages was greater than expected, given their regional species pools. Third, we contrasted the  
104 moments of trait distributions between the two regions.

105 We combined these analytical approaches to test the following predictions: 1) Because of  
106 higher species diversity in the tropics and many more specialized predators, tropical and temperate-  
107 zone ant assemblages differ in morphological diversity and structure; 2) Because temperate forests  
108 experience harsher and more variable climates throughout the year, temperate ant assemblages  
109 should have a stronger imprint of habitat filtering (morphological clustering); and 3) Ecological  
110 traits of ant assemblages are correlated with climate. Our data base of functional traits is one of the  
111 largest compiled to date for ants and includes a large number of species-specific morphological  
112 traits from different assemblages across two extensive environmental gradients. We identified both  
113 similarities and differences in morphological structure of ant assemblages in tropical and temperate  
114 ant faunas and illustrate that analysis of individual traits can reveal unexpected patterns in  
115 relationships between traits, environmental gradients, and changes in land-use.

116

## 117 **Material and Methods**

### 118 **Data Analysis**

#### 119 **Ant assemblages**

120 We used data from two previous studies in which ants were sampled systematically along  
121 two latitudinal gradients (Fig. 1). For the temperate-zone forests, Del Toro (2013) sampled ground-  
122 nesting ants at 67 sites spanning ten degrees of latitude and seven North American Level II  
123 ecoregions in the eastern United States. In the Neotropics, we focused on leaf-litter ant communities  
124 distributed throughout the Atlantic Forests of eastern Brazil. Leaf-litter ants are the most diverse ant  
125 fauna in the world in terms of phenotypic and functional diversity (Silva and Brandão 2010). The

126 Atlantic Forest of eastern Brazil is the second largest tropical forest and spans the largest latitudinal  
127 gradient of all tropical forests in the Neotropics. All statistics analyses were carried out in the R v.  
128 3.2.1 statistical environment (R Core Team 2015). The data and R code are archived online in the  
129 Harvard Forest Archives <http://harvard-forest.fas.harvard.edu/data-archive>.

### 130 **Morphological data**

131 Our study draws on morphological data for 599 species of ants, 508 species from the  
132 Brazilian Atlantic Forest and 91 from temperate eastern North American forests. We examined  
133 fourteen characters that represent various aspects of ant ecology (Table 1; see Silva and Brandão  
134 2010 for morphometric definition of each trait). These variables characterize morphological  
135 structures related to diet, habitat, and foraging strategies and are good proxy measures for ant  
136 species ecology (Silva and Brandão 2010, Arnan et al. 2014, Yates et al. 2014, Gibb et al. 2015b).

137 Measurements of pinned specimens ( $\pm 0.01$  mm) were made using an ocular micrometer  
138 attached to a Leica MZ75 stereomicroscope. We used the highest magnification that allowed the  
139 trait measured to be fitted within the range of the ocular micrometer. We measured fourteen  
140 morphological traits of between 1 and 25 ( $6 \pm 4.7$ ) individuals and of 1 to 11 ( $3 \pm 1.4$ ) individuals  
141 from the temperate and tropical datasets, respectively. A minimum of six individuals of each species  
142 were measured whenever possible. We used Weber's length (Table 1) as the descriptor of body size  
143 and used the other traits (head, mesosoma, metasoma, and body appendages) to describe the shape  
144 of each ant. For polymorphic or dimorphic species only measurements of minor-caste workers were  
145 included in the analyses.

146 We used log-transformed mean trait values for all analyses, as is routinely done for trait-  
147 based studies of continuous morphological characters (Trisos et al. 2014). Morphological traits were  
148 strongly and positively correlated ( $r = 0.65 - 0.96$ ), largely because of their association with overall  
149 body size as well as phylogenetic correlations. To prevent these correlations from biasing analyses  
150 toward detecting only processes associated with body size, we used ordination techniques (based on

151 principal component analysis) to derive independent trait axes.

## 152 **Statistical analyses**

### 153 *Principal component analysis*

154 First we compared ant morphological diversity between the two biogeographic faunas  
155 (temperate in the Nearctic region and tropical in the Neotropical region), based on a principal  
156 component analysis calculated from the correlation matrix of the 14 log-transformed variables  
157 measured for all 599 ant species.

### 158 *Morphological diversity metrics based on multiple traits*

159 We used two standard metrics to quantify morphological diversity: functional diversity (FD:  
160 Petchey and Gaston 2002) and convex hull volume (CHV: Cornwell et al. 2006). Morphological  
161 diversity is a measure of how dispersed a set of species is in the trait space (Petchey and Gaston,  
162 2002), while CHV is the smallest convex set in trait space enclosing all species trait values within a  
163 community (Cornwell et al. 2006). We selected FD and CHV because they are widely used with  
164 presence/absence data and have been shown to have a relatively high power to detect trait clustering  
165 (CHV) and overdispersion (FD) in community assembly simulations (Mouchet et al. 2010, Aiba et  
166 al. 2013). We calculated FD and CHV using three derived trait principal axes that were centered and  
167 relative to the species pool (i.e., the full data set of trait values for each region; see also Villéger et  
168 al. 2008). Because they test concurrently for habitat filtering and niche differentiation, both FD and  
169 CHV are considered to be multiple-niche-axis metrics (Trisos et al. 2014).

170 We also estimated mean morphological diversity (MPD) and mean nearest-neighbor distance  
171 (MNND), both of which have been used commonly as measures of community relatedness and have  
172 been the subject of previous power analyses (Kraft et al. 2007, Trisos et al. 2014) (Table 2). MPD is  
173 the mean of pairwise distances between co-occurring species and is most sensitive to tree-wide  
174 patterns of morphological clustering and evenness (Trisos et al. 2014). Mean pairwise-distance  
175 measures the volume of all species in a community within the morphological space (Webb 2000).

MNND is the mean of the morphological distances separating each species from its closest co-occurring relative and is most sensitive to patterns of morphological clustering or evenness at the tips from a cluster dendrogram of morphological similarity (Kraft et al. 2007); MNND measures how clumped species are in morphological space (Webb 2000).

Further, we analyzed each derived trait axis individually using metrics to test for both assembly patterns (clustering and overdispersion) and metrics used to test for only one assembly pattern (Table 2). We focused on three multi-pattern metrics (Trisos et al. 2014): (1) FD applied to a single trait axis; (2) variance in species values within an assemblage along a single trait axis; and (3) range in species trait values within an assemblage. Variance and range have also been used as measures of trait clustering (Stubbs and Wilson 2004, Kraft et al. 2008, Kraft and Ackerly 2010). We also used one single pattern metric, SD of MNND (the standard deviation of the distances between neighboring species along a single trait axis). This latter index quantifies evenness of species dispersion or packing in morphological space, and is used only to detect the regular spacing in species trait values predicted by competitive exclusion (Kraft and Ackerly 2010). We calculated these metrics using two derived trait principal axes that were centered and relative to the species pool (i.e., the data set of trait values for each regional species pools separately).

We tested differences in morphological diversity between tropical and temperate ant assemblages using linear mixed effect models (LMEs) with a random intercept and random slope terms. We compared models with the same random effect structure but different fixed structure (i.e., morphological diversity ~ observed species richness or morphological diversity ~ observed species richness + region); the random structure was observed species given region. The LMEs allow us to compare morphological diversity between regions accounting for species richness differences in the ant assemblages. We used the *lmer* function in nlme version 3.1-128 (Pinheiro et al. 2016) to build the models.

***Morphological diversity metrics based on single traits***



201 We also selected eight “priority” ant traits to calculate community metrics of spacing of trait  
 202 values (range, variance, SD, mean, kurtosis and skewness), to explore deterministic process in the  
 203 communities. For example, if habitat filtering occurred at the sampling scale, the range of observed  
 204 trait values would be smaller than that expected under a null model. Whereas the range is useful to  
 205 detect effects of a habitat filter, it does have the statistical downside of being susceptible to extreme  
 206 observations that could be due to mass effects (Shmida and Wilson 1985). For this reason, it is  
 207 important to present results for both range and variance of the traits (Cornwell and Ackerly 2009).  
 208 Note that habitat filtering may reduce variance but it may also be affected by niche differentiation.  
 209 Habitat filtering restricts the range of trait values and the limits of similarity affect spacing  
 210 (Cornwell and Ackerly 2009); both of these processes are likely to affect the variance of trait values  
 211 among species within a community. Habitat filtering may shift the mean of the trait distribution  
 212 relative to a null expectation (but also can occur without this effect; Kraft et al. 2008). Likewise, if  
 213 niche differentiation is occurring, the kurtosis of the distribution of trait values, will be smaller than  
 214 expected from a null model (Stubbs and Wilson 2004, Cornwell and Ackerly 2009).

215 We calculated the variance, SD, range, mean, skewness, and kurtosis for the eight selected  
 216 ant traits (HL, SL, EL, MW, DEM, FL, ID, PeH) based on presence-absence of species at a site  
 217 because we were interested in quantity changes that arise from a replacement of species with  
 218 different traits, which reflects among-species variation within communities (Cadotte et al. 2010).

## 219 ***Null models***

220 We used null models to generate expected values of community structure given the observed  
 221 number of species present at each site. We used null models to help identify patterns in the  
 222 assemblages rather than to identify specific ecological processes, including those that alter  
 223 dispersion of a trait (or traits) within a species assemblage as a filter (biotic or abiotic). In the null  
 224 models, both number of species and occurrence of species in the assemblages were maintained. Null  
 225 model simulations were conducted in R using functions from Swenson (2014) modified for our

226 datasets. A measure of structure for a particular assemblage was considered significant if it fell  
227 outside the extremes of the distribution of random structures generated from the null model (Table  
228 2).

229 We defined different species pools to assemble the null communities, constraining which  
230 species could disperse to a given location in the tropical and temperate regions. For the tropical data  
231 set, we used the Atlantic Forest regions defined by Silva and Brandão (2014) and for the temperate  
232 data set we used the five different EPA Level II ecoregions (Del Toro 2013). The following regions  
233 were used in the analysis: temperate data set: (1) Appalachian Forests (18 sites and 63 species), (2)  
234 Atlantic Highlands (22 sites and 65 species), (3) Mixed Wood Plains (13 sites and 53 species), (4)  
235 Southeastern Coastal Plains (7 sites and 54 species), (7) Southeastern US Plains (7 sites and 44  
236 species); tropical data set: (1) high southeastern-south areas (8 sites, 262 species), (2) low  
237 southeastern-south areas (6 sites, 229 species), (3) intermediate latitude areas (4 sites, 239 species),  
238 and (4) north Atlantic Forest areas northeastern (8 sites, 233 species).

### 239 *Environmental gradients and morphological traits*

240 Geographic distributions of ants are affected by a number of environmental characteristics;  
241 temperature and precipitation are usually the strongest direct and indirect correlates (Dunn et al.  
242 2009, Jenkins et al. 2011, Gibb et al. 2015a) as they possibly affect the amount and distribution of  
243 available resources. We therefore tested the hypothesis that aspects of temperature variability and  
244 precipitation were important predictors of ant morphological structure. We obtained for each site  
245 estimates of precipitation and minimum temperature values based on data from WorldClim climate  
246 data layers (Hijmans et al. 2005). Annual precipitation (bioclimatic variable 12) is defined as the  
247 sum of all the monthly precipitation estimates; minimum temperature of coldest month (bioclimatic  
248 variable 6) is defined as the lowest temperature of any weekly minimum temperature.

249 First, we used Pearson's correlation coefficients to examine the relationships between means  
250 of trait values and the two climatic variables. Then, we tested the relationship between the eight

selected traits and the two climatic variables. Relationships between trait means and variances in assemblages and climatic variables can be complex, and may exhibit interactions between drivers and non-linear responses (Símová et al. 2015). We examined these complex relationships using multiple regression in which the eight trait values entered as response variables, while all the environmental variables (linear and quadratic terms) and their interaction terms entered the model as driver variables. Because there is a low overlap in climate between tropical and temperate zones, observed relationships could arise solely because of mean trait differences between zones, and without any actual relationship between traits and climate within each zone. Thus, we included region as a term in the model. We used stepwise selection by AIC in the *MASS* package (Venables and Ripley 2002) to determine the best of the multiple regression models. We used a Type III ANOVA to test for the presence of a main effect after model selection using the *anova* function in the *car* package (Fox and Weisberg 2011), as this approach does not depend on the order of explanatory variables in the model.

## Results

### The morphospace of temperate and tropical assemblages

The first principal component based on the total dataset represented a general size axis accounting for 79% of the total variance, followed by component 2 (9%, eye size and petiole height) and component 3 (3%, distance of eyes to the mandibles and mandible width) (Fig. 2, Supplementary material Appendix 1, Table A1).

### Trait analyses

All results of trait analyses were based on constrained species pools to quantify trait diversity in the ant assemblages. However, unconstrained analyses produced similar results. Tropical assemblages had higher morphological diversity and morphological volume than temperate assemblages (Fig. 3a-b); however, conditional on species richness, MPD and MNND values were not higher in tropical forests than temperate forests (Fig. 3c-d; Supplementary material Appendix 1,

Table A2; Appendix 2, Figs. A1-A2). Temperate assemblages had larger variance in size (PC1) whereas tropical assemblages had larger range values. Functional diversity metric (FD) from PC1 axis had higher values in tropical assemblages. SD of MNND suggested higher species packing in tropical assemblages as calculated from PC1 axis (Fig. 4a-d). However, the differences in trait diversity values in tropical assemblages as calculated from PC1 axis were not higher than temperate forests given their species richness (Supplementary material Appendix 1, Table A2).

## Single trait analysis

The moments of trait distributions indicated clear trait differences between temperate and tropical assemblages. The community mean of traits was strongly different between regions; temperate assemblages had larger values of traits and tropical assemblages higher density of small values (Fig. 5). Further, tropical assemblages had higher asymmetry in mean trait values. On the other hand, the distribution of mean traits calculated from species pools had large overlap between regions (Supplementary material Appendix 2, Fig. A3).

Neotropical assemblages had higher right-skewed trait distribution suggesting that most co-occurring species tended to have similar trait values (as also suggested by MNND and SD of MNND) (Supplementary material Appendix 2, Fig. A4). Distance of the eye to the mandibles had larger overlap in skewness distribution at the assemblage level. However, the distribution of community variance was relatively similar between regions, except for the variance of the distance of the eye to the mandibles in the temperate region (Supplementary material Appendix 2, Fig. A5).

Kurtosis had strong differences between regions. In general, temperate assemblages had smaller values, suggesting more platykurtic distribution and indicating an increase in the average trait dissimilarity between co-occurring species (Supplementary material Appendix 2, Fig. A6). Finally, we did not find clear differences in trait ranges; scape length, eye length and the distance of the eye to the mandibles had large overlaps in range of values (Supplementary material Appendix 2, Fig. A7).

## 301 **Null model analysis**

302 Overall, we found weak evidence of habitat filtering or niche differentiation at the  
303 assemblage scale. Non-random values in the morphological metrics were rarely observed. The  
304 proportion of temperate assemblages in which we detected significant values in the metrics ranged  
305 from less than 1 to 16% and was rarely observed in the Neotropical region. Habitat filtering was  
306 detected more commonly in the temperate assemblages, especially for the moments of trait  
307 distributions for eight selected ant traits (Supplementary material Appendix 1, Table A3). This  
308 pattern also was detected for single trait analysis (PC1 or PC2), although significant results  
309 decreased when PC2 was considered (probably because PC2 had a very low contribution to the  
310 variance in the morphospace). Significant lower morphological diversity than expected was  
311 detected mainly in temperate assemblages (Supplementary material Appendix 1, Table A3, for  
312 multiple trait metrics). Null models testing using constrained species pools yielded similar deviation  
313 from the null expectation, consistent with the results of unconstrained analysis (Supplementary  
314 material Appendix 1, Table A4).

## 315 **The relationship between assemblage trait variation and climate**

316 Mean trait values of all 599 measured ant species were characterized by high correlations,  
317 which influenced the relationship between trait means and climate variables. Trait means of HL, SL,  
318 EL, PeH, DEM, and FL all were best explained by the region term in the model, without climate  
319 relationships; tropical assemblages were characterized by lower mean trait values than temperate  
320 assemblages. By the other hand, MW and ID means were best explained by the quadratic term of  
321 temperature and region; the relationship was concave and trait means values decreased with  
322 increasing temperature (Supplementary material Appendix 1, Table A5). The relationship between  
323 trait variances and climate were more variable, suggesting that variation in variances in trait values  
324 was driven by region and multiple environmental factors. Trait variances of EL, PeH, MW, and the  
325 DEM were all best explained by region, without climate relationships; temperate assemblages had

larger variance in traits than tropical assemblages. Variance in HL and FL were best explained by the quadratic term of temperature and region; the relationship was concave and variance values decreased with increasing temperature. The quadratic term of precipitation, region and the interaction term between temperature and precipitation were the best predictors of variance in SL. Finally, ID had no relationship with region or climate (Supplementary material Appendix 1, Table A5).

## Discussion

We found strong differences in morphological space occupied by ant communities in temperate and tropical regions. As expected, ant communities in tropical areas showed higher morphological diversity; however, temperate ant communities showed higher variance in size. We found evidence that tropical assemblages harbor higher levels of morphological diversity than the temperate-zone ants. In general, more diverse niches and fewer gaps within the total niche space are expected in diverse tropical communities than in those from similar habitats containing fewer species at higher latitudes (Winemiller et al. 2015).

Although there was an overall higher diversity of traits in the tropics, we unexpectedly did not find more tightly packed species in the tropics within the trait space. Such species packing could result from a lack of biotic interactions (or Connell's "ghost of competition past"), low population sizes reducing the encounter rate of species, or finer partitioning of local scale environmental gradients (Swenson and Weiser 2014). It is interesting that different results (higher functional diversity and species packing) were found in comparisons of plant functional diversity between North and South America (Swenson et al. 2012). Recent studies on phylogenetic structure of arboreal (Blaimer et al. 2015) and leaf-litter ant communities (Donoso 2014) also have suggested that habitat filtering structures the communities in humid forests, selecting for related species with similar ecological traits and leading to a clustered pattern. By contrast, in temperate forests of North America and Europe, Machac et al. (2011) found evidence either for overdispersion or random

351 structure at lower elevation and clustering at high elevation sites.

352 Because temperate-zone ant communities showed similar species packing (quantified as the  
353 mean nearest neighbor distance in multivariate trait space), we hypothesize that the higher  
354 morphospace volume and functional diversity in tropical communities occurs via an increase in the  
355 morphological volume. This also suggests that as species are added to assemblages they tend to  
356 expand the volume to a greater degree than they pack the functional volume.

# 357 *Null models and morphological structure*

358 There was little evidence within either temperate or Neotropical ant assemblages of habitat  
359 filtering or niche differentiation patterns based on our null models, although as expected, habitat  
360 filtering was detected more commonly in the temperate-zone ant assemblages. In abiotically harsh  
361 environments assemblages should contain a non-random subset of species that are more  
362 functionally similar than expected (Swenson et al. 2012). The absence of both clustering and  
363 overdispersion in traits has been reported fairly widely in plants and for some animal communities  
364 at local scales, and is typically interpreted as evidence for a neutral model of community assembly  
365 (Trisos et al. 2014). The use of multiple niche axis metrics, as mean pairwise morphological  
366 distances (a measure of overall dispersion of morphology for each local assemblage), detected that  
367 16% of temperate assemblages had lower than expected functional diversity given their observed  
368 species richness. In fact, niche filtering rather than niche partitioning appears to structure ant  
369 assemblages in temperate forests in the south-eastern United States (Fowler et al. 2014). It is  
370 relatively well known that processes that shape ant communities depend on spatial scale and likely  
371 vary among ecosystems (Nipperess and Beattie 2004, Gotelli and Ellison 2002, Sanders et al. 2007,  
372 Fowler et al. 2014).

373 We found weak patterns of niche differentiation in the tropical dataset. Community ecology  
374 studies generally predict that niche differentiation will be a dominant influence on community  
375 assembly in the tropics (Algar et al. 2011, Winemiller et al. 2015). Our null model analysis may be

potentially biased because the analyzed scale may be inadequate to detect niche differentiation evidences. However, similar analyses for the tropical data set by Silva and Brandão (2014) using a smaller number of traits and constrained pool null models also did not find strong evidences of under- or overdispersion in the leaf-litter ant fauna, but suggested shifts in the morphospace structure along the latitudinal gradient. In this case, co-occurrence analysis at sample point scale (1 m<sup>2</sup>) or constrained by guilds can be particularly informative (Silva and Brandão 2014) because patterns of morphological structure should be more probable within, rather than across feeding guilds.

The prediction that under more harsh climatic conditions the North America assemblages should be constrained more often by habitat filtering also was supported only weakly by examination of a single niche axis. Our result appear to contradict recent studies on habitat filtering that found strong significant evidence for convergence in ant communities traits in North America (e.g., Fowler et al. 2014). In conclusion, we did not find strong pattern of non-random convergence or divergence in traits when comparing to the species pool of temperate or tropical regions. Rather, the link between ecological assembly processes and trait patterns might be complex and weak (Gerhold et al. 2015).

# *Single trait analysis*

The use of selected single traits to compare trait distribution between assemblages was useful in describing differences between regions. We suggest that focused analysis of single traits may be an important approach to compare and describe the distribution of ant functional diversity. Trait-based metrics combine multiple traits into a single analysis (e.g., functional diversity) and because different traits are often associated with different niche axes, these metrics may have the advantage of providing an integrated overview of community structure (Trisos et al. 2014). However, if different assembly processes act on separate traits or exert combined effects, a potential drawback is that multiple-traits may combine signals of contrasting assembly processes (Swenson



401 and Enquist 2009, Trisos et al. 2014).

402       The moments of trait distributions showed marked differences between temperate and  
403 tropical assemblages. For example, the distribution in size of ant attributes was strongly right  
404 skewed, indicating higher density of smallest ants in tropical sites. The bulk of leaf-litter ant species  
405 is composed by very small species, spanning diverse trophic groups (generalist and specialist  
406 predators, omnivorous species, from small to medium size; Silva and Brandão 2010, Donoso,  
407 2014).

408       Single trait analyses revealed not only differences between ant morphology in tropical and  
409 temperate assemblages, but also different within-region responses of traits in variance, kurtosis,  
410 skewness and range. Although there was a high correlation between traits, the analysis of the  
411 moments of trait distributions suggested that all selected traits can be important to detect differences  
412 in morphological structure. In particular, both variance and kurtosis in the distance of the eye to the  
413 mandible insertion showed it to be the strongest difference comparing assemblages and we suggest  
414 that it may be an important attribute to trait-based analysis of ant communities. Eye morphology  
415 seems to be particularly important in trait-based studies; eye relative size in ants is related to period  
416 of activity (Yilmaz et al. 2014), degree of predatory behavior (Fowler et al. 1991), determines the  
417 ability to see laterally, and influences the success of species travelling through complex habitats  
418 (e.g., leaf-litter habitat) (Gibb and Parr 2013).

419       The trait distributions in skewness or kurtosis also suggest that in Neotropical ant  
420 assemblages most co-occurring species tend to have similar traits, whereas in temperate  
421 assemblages there tends to be on average higher trait dissimilarity between co-occurring species. In  
422 fact, the results of multiple trait analysis suggest that temperate communities have higher trait  
423 dissimilarity than tropical communities. Of course, tropical species exhibit an extraordinary variety  
424 of adaptations molded by their interactions with resources, competitors, and antagonists (Ricklefs  
425 2012). In sum, our results suggest that the larger tropical species pools occupy a morphological

426 space distinct from that of temperate species but not a more tightly packed morphospace.

427         In general, we can confidently describe that leaf-litter ant fauna in the Neotropics as  
428 composed by more specialist taxa (Delabie et al. 2000) and that the epigaeic temperate-zone ant  
429 fauna includes predominantly opportunistic and omnivorous feeders species (Ellison et al. 2013).  
430 The range distribution of a petiole measure, as such petiole height, showed strong difference  
431 between tropical and temperate ant assemblages. Ant petiole measures may be used to describe  
432 morphological groups of species, especially for predator species (Silva and Brandão 2014). We  
433 suggest that petiole measures also should be considered to understand how ant traits respond to  
434 environment, especially in the tropics where predators are often an important component of  
435 communities.

436         Taken together, the results of single trait analysis suggest that choosing traits that can be  
437 used to test hypotheses can be important for detecting differences in morphological structure of ant  
438 communities, especially when considering effects of disturbance and climatic change on  
439 assemblage structure. Our results also support a recent trend in community ecology that proposes  
440 not only the integration of data sets but also their subdivision into niche axes before analysis  
441 (Spasojevic and Suding 2012, Trisos et al. 2014, Winemiller et al. 2015).

#### 442 *Ant traits and habitat characteristics*

443         Ant traits have been shown to respond to habitat characteristics such as structural  
444 complexity (Farji-Brener et al. 2004, Gibb and Parr 2010, Yates et al. 2014). For example, leg  
445 length decreases with habitat complexity (Farji-Brener et al. 2004, Sarty et al. 2006, Gibb and Parr  
446 2010). Gibb and Parr (2013) extended analysis testing morphological trait responses to habitat  
447 complexity in sites on three continents, finding predictive responses of sensory morphology of ant  
448 assemblages to habitat complexity. Eye position has been suggested as a key response variable to  
449 predatory behavior (Silva and Brandão 2014) and habitat complexity (Gibb and Parr 2013). Clear  
450 differences between macrohabitats in in ant's scape length, eye size, leg length, and body size have

451 been described (Yates et al. 2014, Schofield et al. 2016); further, ant morphology may respond to  
452 competition (Nipperess and Beattie 2004).

453 Temperature and precipitation are considered drivers of ant species richness patterns at  
454 global scale (Dunn et al. 2009, Jenkins et al. 2011, Gibb et al. 2015a) and recent studies also suggest  
455 a strong relationship between temperature and ant functional responses (Diamond et al. 2012,  
456 Stuble et al. 2013). Ant functional diversity decreased with reduced temperature in a high elevation  
457 gradient (Raymond et al. 2013) and climate seasonality played an important role in shaping the  
458 occurrence of functional species traits in Mediterranean ant communities (Arnan et al. 2014). Our  
459 analysis suggests that trait mean values all were correlated with region; size also decreased with  
460 increasing temperature for some traits. Our environmental model largely reflects the smaller ants in  
461 tropical assemblages. On the other hand, the environmental model for trait variances largely reflects  
462 the higher variance in ant traits in temperate assemblages. However, the response of trait variances  
463 was more complex and the explained variance by models was lowest compared to the trait mean  
464 model. For example, head length, and femur length correlated negatively with temperature.  
465 Interactions between temperature and precipitation were detected for trait related to food search (as  
466 scape length), suggesting that relationships between climate and traits varies for ants among  
467 regions.

#### 468 *Concluding remarks*

469 The human-induced extinction of species in the Anthropocene (Dirzo et al. 2014) with  
470 ongoing biotic impoverishment may alter key ecosystem processes with important consequences for  
471 ecosystem services needed by the humanity (Mouillot et al. 2014). Our results indicate that ant traits  
472 respond to environmental gradients and single trait analysis may be an important approach to  
473 analyze the loss of particular functions delivered by ants. This approach may guide future studies on  
474 ant responses to habitat modification and climate change. Although many aspects of the  
475 morphological structure in ant communities are as yet unexplored (including the relationship

476 between morphology and the variety of resources), our results underline the importance of  
477 morphological analyses in arthropod communities and point out to the need for more through  
478 characterization of morphological space for modeling the impacts of habitat disturbance and climate  
479 change on morphological diversity.

## 480 **Acknowledgments**

481 Funding was provided by grants from the Fundação de Amparo à Pesquisa do Estado de São Paulo  
482 (2010/51194-1 and 2010/20570-8), and by Conselho Nacional de Desenvolvimento Científico e  
483 Tecnológico (CNPq) through a PCI short-term grant (170040/2015-1) to Rogério R. Silva.

## 485 **References**

- 486 Aiba, M. et al. 2013. Robustness of trait distribution metrics for community assembly studies under  
487 the uncertainties of assembly processes. – *Ecology* 94: 2873–2885.
- 488 Algar, A. C. et al. 2011. Quantifying the importance of regional and local filters for community trait  
489 structure in tropical and temperate zones. – *Ecology* 92: 903–914.
- 490 Arnan, X. et al. 2014. Ant functional responses along environmental gradients. – *J. Anim. Ecol.* 83:  
491 1398–1408.
- 492 Blaimer, B .B. et al. 2015. Functional and phylogenetic approaches reveal the evolution of diversity  
493 in a hyper diverse biota. – *Ecography* 38: 901-912.
- 494 Cadotte, M. W., et al. 2010. Phylogenetic diversity metrics for ecological communities: integrating  
495 species richness, abundance and evolutionary history. – *Ecol. Lett.* 13: 96–105.
- 496 Cadotte, M. W. et al. 2013. The ecology of differences: assessing community assembly with trait  
497 and evolutionary distances. – *Ecol. Lett.* 16: 1234–1244.
- 498 Cadotte, M. W. et al. 2015. Predicting communities from functional traits. – *Trends Ecol. Evol.* 30:  
499 510-511.
- 500 Cornwell, W. K. and Ackerly, D. D. 2009. Community assembly and shifts in plant trait

- 501 distributions across an environmental gradient in coastal California. – Ecol. Monogr. 79: 109–
- 502 126.
- 503 Cornwell, W. K. et al. 2006. A trait-based test for habitat filtering: convex hull volume. – Ecology
- 504 87: 1465–1471.
- 505 Delabie, J. H. C. et al. .2000. Litter ant communities of the Brazilian Atlantic rain forest region. In:
- 506 Agosti, D., Majer, J.D., Alonso, L.E. and Schultz, T. Sampling ground-dwelling ants: case
- 507 studies from world’s rain forests. – Curtin University School of Environmental Biology
- 508 Bulletin 18: 1–17.
- 509 Del Toro, I. 2013. Diversity of Eastern North American ant communities along environmental
- 510 gradients. – PLoS One 8: e67973.
- 511 Del Toro I. et al. 2012. The little things that run the world revisited: a review of ant-mediated
- 512 ecosystem services and disservices (Hymenoptera: Formicidae). – Myrmecol. News 17: 133–
- 513 146.
- 514 Del Toro, I. et al. 2015. Ant-mediated ecosystem functions on a warmer planet: effects on soil
- 515 movement, decomposition and nutrient cycling. – J. Anim. Ecol. 84: 1233–1241.
- 516 Diamond, S. E. et al. 2012. A physiological trait-based approach to predicting the responses of
- 517 species to experimental climate warming. – Ecology 93: 2305–2312.
- 518 Dirzo R. et al. 2014. Defaunation in the Anthropocene. – Science 345: 401–406.
- 519 Donoso, D.A. 2014. Assembly mechanisms shaping tropical litter ant communities. – Ecography
- 520 37: 490–499.
- 521 Dunn, R. R. et al. 2009. Climatic drivers of hemispheric asymmetry in global patterns of ant species
- 522 richness. – Ecol. Lett. 12: 324–333.
- 523 Eisner, T. 1957. A comparative morphological study of the proventriculus of ants (Hymenoptera:
- 524 Formicidae). – Bull. Mus. Comp. Zool. 116: 441–490.

- 525 Ellison, A. M et al. 2012. A field guide to the ants of New England. Yale University Press.
- 526 Farji-Brener, A. G. et al. 2004. Environmental rugosity, body size and access to food: a test of the  
527 size-grain hypothesis in tropical litter ants. – *Oikos* 104: 165–171.
- 528 Fortunel, C. et al. 2014. Environmental factors predict community functional composition in  
529 Amazonian forests. – *J. Ecol.* 102: 145–155.
- 530 Fox, J. and Weisberg, S. 2011. An {R} Companion to Applied Regression, Second Edition.  
531 Thousand Oaks CA: Sage. <<http://socserv.socsci.mcmaster.ca/jfox/Books/Companion>>.
- 532 Fowler, D. et al. 2014. Niche filtering rather than partitioning shapes the structure of temperate  
533 forest ant communities. – *J. Anim. Ecol.* 83: 943–952.
- 534 Fowler, H. G. et al. 1991. Ecologia nutricional de formigas. In: Panizzi, A.R. and Parra, J.R.P.  
535 (eds.). *Ecologia nutricional de insetos*. São Paulo, Editora Manole. p. 131–223.
- 536 Gerhold, P. et al. 2015. Phylogenetics patterns are not proxies of community assembly mechanisms  
537 (they are far better). – *Funct. Ecol.* 29: 600–614.
- 538 Gibb, H. and Cunningham, S. A. 2013. Restoration of trophic structure in an assemblage of  
539 omnivores, considering a revegetation chronosequence. – *J. Appl. Ecol.* 50: 449–458.
- 540 Gibb, H. and Parr, C. L. 2010. How does habitat complexity affect ant foraging success? A test of  
541 functional responses on three continents. – *Oecologia* 164: 1061–1073.
- 542 Gibb, H. and Parr, C. L. 2013. Does structural complexity determine the morphology of  
543 assemblages? An experimental test on three continents. – *PLoS One* 8: e64005.
- 544 Gibb, H. et al. 2015a. Climate mediates the effects of disturbance on ant assemblage structure. –  
545 *Proc. R. Soc. Lond. B Biol. Sci.* 282: 20150418.
- 546 Gibb, H. et al. 2015b. Does morphology predict trophic position and habitat use of ant species and  
547 assemblages? – *Oecologia* 177: 519–531.

- 548 Gotelli, N. J. and Ellison, A. M. 2002. Biogeography at a regional scale: determinants of ant species  
549 density in New England bogs and forests. – Ecology 83: 1604–1609.
- 550 Farji-Brener, A. G. et al. 2004. Environmental rugosity, body size and access to food: a test of the  
551 size-grain hypothesis in tropical litter ants. – Oikos 104: 165–171.
- 552 Fowler, D. et al. 2014. Niche filtering rather than partitioning shapes the structure of temperate  
553 forest ant communities. – J. Anim. Ecol. 83: 943–952.
- 554 Hijmans, R. J. et al. 2005. Very high resolution interpolated climate surfaces for global land areas. –  
555 Int. J. Climatol. 25: 1965–1978.
- 556 Inward, D. J. et al. 2011. Local and regional ecological morphology of dung beetle assemblage  
557 across four biogeography regions. – J. Biogeogr. 30: 1668–1682.
- 558 Jenkins, C. N. et al. 2011. Global diversity in light of climate change: the case of ants. – Divers.  
559 Distrib. 17: 652–662.
- 560 Kaspari, M. and Weiser, M. 1999. The size-grain hypothesis and interspecific scaling in ants. –  
561 Funct. Ecol. 13: 530–538.
- 562 Kraft, N. J. B. and Ackerly, D. D. 2010. Functional trait and phylogenetic tests of community  
563 assembly across spatial scales in an Amazonian forest. – Ecol. Monogr. 80: 401–422.
- 564 Kraft, N. J. B. et al. 2007. Trait evolution, community assembly, and the phylogenetic structure of  
565 ecological communities. – Am. Nat. 170: 271–283.
- 566 Kraft, N. J. B. et al. 2008. Functional traits and niche-based tree community assembly in an  
567 Amazonian forest. – Science 322: 580–582.
- 568 Lamanna, C. et al. 2014. Functional trait space and the latitudinal diversity gradient. – Proc. Natl.  
569 Acad. Sci. USA 111: 13745–13750.
- 570 Machac, A. et al. 2011. Elevational gradients in phylogenetic structure of ant communities reveal  
571 the interplay of biotic and abiotic constraints on diversity. – Ecography 34: 364–371.
- 572 McClain, C. R. et al. 2004. Morphological disparity as a biodiversity metric in lower bathyal and

- abyssal gastropod assemblages. – *Evolution* 58: 338–348.
- McGill, B. J. et al. 2015. Fifteen forms of biodiversity trend in the Anthropocene. – *Trends Ecol. Evol.* 30: 104–113.
- Montaña, C. G. and Winemiller, K. O. 2010. Local-scale habitat influences morphological diversity of species assemblages of cichlid fishes in a tropical floodplain river. – *Ecol. Freshw. Fish.* 19: 216–227.
- Montaña, C. G. et al. 2014. Intercontinental comparison of fish ecomorphology: null model tests of community assembly at the patch scale in rivers. – *Ecol. Monogr.* 84: 91–107.
- Mouchet, M. A. et al. 2010. Functional diversity measures: an overview of their redundancy and their ability to discriminate community assembly rules. – *Funct. Ecol.* 24: 867–876.
- Mouillot, D. et al. 2005. Niche overlap estimates based on quantitative functional traits: A new family of non-parametric indices. – *Oecologia* 145: 345–353.
- Mouillot, D. et al. 2014. Functional over-redundancy and high functional vulnerability in global fish faunas on tropical reefs. – *Proc. Natl. Acad. Sci. USA* 111: 13757–13762.
- Nipperess, D. A. and Beattie, A. J. 2004. Morphological dispersion of *Rhytidoponera* assemblages: the importance of spatial scale and null model. – *Ecology* 85: 2728–2736.
- Petchey, O. L. and Gaston, K. J. 2002. Extinction and the loss of functional diversity. – *Proc. R. Soc. Lond. B Biol. Sci.* 269: 1721–1727.
- Pie, M. R. and Traniello, J. F. A. 2007. Morphological evolution in a hyperdiverse clade: the ant genus *Pheidole*. – *J. Zool.* 271: 99–109.
- Pinheiro J. et al. 2016. nlme: Linear and Nonlinear Mixed Effects Models. R package version 3.1-128, <<http://CRAN.R-project.org/package=nlme>>.
- Raymond, A. et al. 2013. Functional diversity decreases with temperature in high elevation ant fauna. – *Ecological Entomology* 38: 364–373.
- Ricklefs, R.E. 2012. Species richness and morphological diversity of passerine birds. – *Proc. Natl.*



- 598 Acad. Sci. USA 109: 14482–14487.
- 599 Retana, J. et al. 2015. A multidimensional functional trait analysis of resource exploitation in  
600 European ants. – *Ecology* 96: 2781–2793.
- 601 Ricklefs, R. E. and Travis, J. 1980. A morphological approach to the study of avian community  
602 organization. – *Auk* 97: 321–338.
- 603 Sanders, N. J. et al. 2007. Assembly rules of ground-foraging ant assemblages are contingent on  
604 disturbance, habitat and spatial scale. – *J. Biogeogr.* 34: 1632–1641.
- 605 Sarty, M. et al. 2006. Habitat complexity facilitates coexistence in a tropical ant community. –  
606 *Oecologia* 149: 465–473.
- 607 Schofield, S.F. et al. 2016. Morphological characteristics of ant assemblages (Hymenoptera:  
608 Formicidae) differ among contrasting biomes. – *Myrmecol. News* 23: 129–137.
- 609 Shmida, A. and Wilson, M. V. 1985. Biological determinants of species diversity. – *J. Biogeogr.* 12:  
610 1–20.
- 611 Silva, R. R. and Brandão, C. R. F. 2010. Morphological patterns and community organization in  
612 leaf-litter ant assemblages. – *Ecol. Monogr.* 80: 107–124.
- 613 Silva, R. R. and Brandão, C. R. F. 2014. Ecosystem-wide morphological structure of leaf-litter ant  
614 communities along a tropical latitudinal gradient. – *PLoS One* 9: e93049.
- 615 Símová, I. et al. 2015. Shifts in trait means and variances in North American tree assemblages:  
616 species richness patterns are loosely related to the functional space. – *Ecography* 38: 649–658.
- 617 Spasojevic, M. J. and Suding, K. N. 2012. Inferring community assembly mechanisms from  
618 functional diversity patterns: the importance of multiple assembly mechanisms. – *J. Ecol.* 100:  
619 652–661.
- 620 Stevens, R. D. et al. 2006. Latitudinal gradients in the phenetic diversity of New World bat  
621 communities. – *Oikos* 112: 41–50.
- 622 Stubbs, W. J. and Wilson, J. B. 2004. Evidence for limiting similarity in a sand dune community. –

- 623 J. Ecol. 92: 557–567.
- 624 Stuble, K. L. et al. 2013. Tradeoffs, competition, and coexistence in eastern deciduous forest ant  
625 communities. – *Oecologia* 171: 981–992.
- 626 Swenson, N. G. 2014. *Functional and Phylogenetic Ecology* in R. Springer, New York. 212p.
- 627 Swenson, N. G. and Enquist, B. J. 2009. Opposing assembly mechanisms in a Neotropical dry  
628 forest: implications for phylogenetic and functional community ecology. – *Ecology* 90: 2161–  
629 2170.
- 630 Swenson, N. G. et al. 2012. The biogeography and filtering of woody plant functional diversity in  
631 North and South America trees. – *Glob. Ecol. Biogeogr.* 21: 798–808.
- 632 Swenson, N. G. and Weiser, M. D. 2014. On the packing and filling of functional space in eastern  
633 North American tree assemblages. – *Ecography* 37: 1056–1062.
- 634 Trisos, C. H. et al. 2014. Unraveling the interplay of community assembly processes acting on  
635 multiple niche axes across spatial scales. *Am. Nat.* 184: 593–608.
- 636 Venables, W. N. and Ripley, B. D. 2002. *Modern Applied Statistics with S*. Fourth Edition. Springer,  
637 New York.
- 638 Villéger, S. et al. 2008. New multidimensional functional diversity indices for a multifaceted  
639 framework in functional ecology. – *Ecology* 89: 2290–2301.
- 640 Webb, C. O. 2000. Exploring the phylogenetic structure of ecological communities: an example for  
641 rainforest trees. – *Am. Nat.* 156: 145–155.
- 642 Wiescher, P. T. et al. 2012. Assembling an ant community: species functional traits reflect  
643 environmental filtering. – *Oecologia* 169: 1063–1074.
- 644 Willis, S. C. et al. 2005. Habitat structural complexity and morphological diversity of fish  
645 assemblages in a Neotropical floodplain river. – *Oecologia* 142: 284–295.
- 646 Wilson, E. O. and Hölldobler, B. 2005. The rise of the ants: a phylogenetic and ecological  
647 explanation. – *Proc. Natl. Acad. Sci. USA* 102: 7411–7414.

- 648 Winemiller, K. O. 1991. Ecomorphological diversification in lowland freshwater fish assemblages  
649 from five biotic regions. – Ecol. Monogr. 61: 343–365.
- 650 Winemiller, K. O. et al. 2015. Functional traits, convergent evolution, and periodic tables of niches.  
651 – Ecol. Lett. 18: 737–751.
- 652 Yates, M. L. et al. 2014. Morphological traits: predictable responses to macrohabitats across a 300  
653 km scale. – PeerJ 2: e271.
- 654 Yilmaz, A. et al. 2014. Eye structure, activity rhythms, and visually-driven behavior are tuned to  
655 visual niche in ants. – Front. Behav. Neurosci. 8: 1–9.
- 656

**Table 1.** The fourteen ant traits used in this study, the code given to each trait and a description of the functional significance of traits.

| Morphological trait                           | Code | Functional significance                                                                                                                                                                                                                                                                      |
|-----------------------------------------------|------|----------------------------------------------------------------------------------------------------------------------------------------------------------------------------------------------------------------------------------------------------------------------------------------------|
| Head Length                                   | HL   | Indicative of diet; longer heads may accommodate larger mandibular muscles that allow capture of larger or fiercer prey (Fowler et al. 1991).                                                                                                                                                |
| Head Width                                    | HW   | Size of spaces through which ant can pass (Sarty et al. 2006); wider heads may accommodate larger mandibular muscles that allow capture of larger or fiercer prey                                                                                                                            |
| Mandible Width                                | MW   | May indicate feeding behavior; wider mandibles may cut and masticate larger food resources; further may keep, transport and hold larger preys (Fowler et al. 1991).                                                                                                                          |
| Mandible Length                               | ML   | Longer mandibles permit attack larger prey; narrow, sublinear to linear and long mandibles describe species with trap-jaw mandibles employed for hunting.                                                                                                                                    |
| Clypeus Length                                | CL   | Clypeus length is related to sugar feeding in ants (Eisner 1957).                                                                                                                                                                                                                            |
| Scape Length                                  | SL   | Sensory morphology, related to an ant's ability to navigate, sense and move through its surroundings (Yates et al. 2014).                                                                                                                                                                    |
| Eye Length                                    | EL   | Eye size indicates feeding behavior (Yates et al. 2014); hypogaeic predatory ants have smaller eyes, whereas epigaeic predatory ants have greater eyes.                                                                                                                                      |
| Interocular Distance                          | ID   | Eye position; eyes set farther apart may be important in more complex habitats (Gibb and Parr 2013). Also indicates feeding behavior; hypogaeic predatory ants have eyes set very close to the mandible; epigaeic predatory ants or generalist species have eye set away from the mandibles. |
| Distance of the eye to the mandible insertion | DEM  |                                                                                                                                                                                                                                                                                              |
| Pronotum Width                                | PW   | Size of spaces through which ant can pass (Sarty et al. 2006); narrow pronotum may permit access to resources in small cavities; also, it is a proxy for size in ants.                                                                                                                       |
| Weber's Length                                | WL   | Proxy for body size in ants; strongly correlated with many physiological, ecological, and life-history traits, including as resource use (Arnan et al. 2014).                                                                                                                                |
| Femur length                                  | FL   | Longer legs enable species to discover food resources more quickly (Gibb and Parr 2013); there appears to be some advantage to shorter-legged species in more complex habitats (Farji-Brener et al. 2004).                                                                                   |
| Petiole Length                                | PeL  | The dimensions of petiole (length, height and width) are related to trophic position and predator behavior (Silva and Brandão 2010).                                                                                                                                                         |
| Petiole Height                                | PeH  |                                                                                                                                                                                                                                                                                              |

662 **Table 2.** List of selected morphological metrics, hypothesis tested, predictions, and description of the biological significance.  
 663

| Hypothesis                                                |                                             | Expected (values)                   | Expected (p-value)           | Description                                                                                                                                                                                                                                          |
|-----------------------------------------------------------|---------------------------------------------|-------------------------------------|------------------------------|------------------------------------------------------------------------------------------------------------------------------------------------------------------------------------------------------------------------------------------------------|
| <b>Multiple-traits metrics</b>                            |                                             |                                     |                              |                                                                                                                                                                                                                                                      |
| FD                                                        | Habitat filtering and niche differentiation | Lower or higher than the null model | $\leq 0.025$ or $\geq 0.975$ | Small values means similar co-occurring species or low FD; high values means dissimilar co-occurring species or high FD (Kraft et al. 2007, Mouchet et al. 2010, Swenson 2014).                                                                      |
| CHV                                                       | Habitat filtering and niche differentiation | Lower or higher than the null model | $\leq 0.025$ or $\geq 0.975$ |                                                                                                                                                                                                                                                      |
| MPD                                                       | Habitat filtering and niche differentiation | Lower or higher than the null model | $\leq 0.025$ or $\geq 0.975$ |                                                                                                                                                                                                                                                      |
| MNND                                                      | Niche differentiation                       | Higher than the null model          | $\geq 0.950$                 | If specie's traits reflect partitioning, we would then expect a non-random, even spacing of trait values within communities; in general, decrease with increasing species richness (Kraft et al. 2007, Swenson 2014).                                |
| <b>Single-axis PCA metrics</b>                            |                                             |                                     |                              |                                                                                                                                                                                                                                                      |
| FD                                                        | Overdispersion or clustering                | Lower or higher than the null model | $\leq 0.025$ or $\geq 0.975$ | Small values means similar co-occurring species or low FD; high values means dissimilar co-occurring species or high FD.                                                                                                                             |
| Variance                                                  | Overdispersion or clustering                | Lower or higher than the null model | $\leq 0.025$ or $\geq 0.975$ | Trait variance within an assemblage lower than expected from regional species pool reflects a decrease in the available niche space (Stubbs and Wilson 2004, Kraft and Ackerly 2010).                                                                |
| Range                                                     | Overdispersion or clustering                | Lower or higher than the null model | $\leq 0.025$ or $\geq 0.975$ | Assembly processes can restrict the range of trait values at a given community; another processes (e.g. limit of similarity) can influence the spacing of trait values within the restricted range (Stubbs and Wilson 2004, Kraft and Ackerly 2010). |
| SD of MNND                                                | Niche differentiation                       | Higher than the null model          | $\geq 0.950$                 | Similar to MNND, used to detect only the regular spacing in species trait values (Kraft and Ackerly 2010, Trisos et al. 2014).                                                                                                                       |
| <b>Moments of the trait distributions for communities</b> |                                             |                                     |                              |                                                                                                                                                                                                                                                      |
| Variance                                                  | Habitat filtering                           | Lower than the null model           | $\leq 0.050$                 | Assembly processes can restrict the variance of trait                                                                                                                                                                                                |

|          |                       |                                   |                              |                                                                                                                                                                                                                                                                                                                                    |
|----------|-----------------------|-----------------------------------|------------------------------|------------------------------------------------------------------------------------------------------------------------------------------------------------------------------------------------------------------------------------------------------------------------------------------------------------------------------------|
| SD       | Habitat filtering     | Lower values than the null model  | $\leq 0.050$                 | values at a given community (Swenson 2014).<br>Higher standard deviation values are indicative of more functional diversity in a community; co-occurrence of functionally similar species will be reflected by a lower standard deviation (Swenson 2014).                                                                          |
| Range    | Habitat filtering     | Lower than the null model         | $\leq 0.050$                 | Assembly processes can restrict the range of trait values at a given community (Kraft and Ackerly 2010, Swenson 2014).                                                                                                                                                                                                             |
| Skewness | Habitat filtering     | Higher values than the null model | $\geq 0.950$                 | Higher values indicate that most co-occurring species tend to have similar traits values (Swenson 2014).                                                                                                                                                                                                                           |
| Mean     | Habitat filtering     | Just “change”                     | $\leq 0.025$ or $\geq 0.975$ | Shifts in site mean trait values indicate environmental filtering, whereby convergent trait values are expected for co-occurring species due to environmental trait selection; habitat filtering affect mean trait values through differences in species composition, species abundance, and phenotypic plasticity (Swenson 2014). |
| Kurtosis | Niche differentiation | Lower values than the null model  | $\leq 0.050$                 | Lower values (platykurtic distribution) may indicate an increase in the average trait dissimilarity between co-occurring species; a process that spreads species trait values in communities, result in lower values than expected distribution within communities (Swenson 2014).                                                 |

664  
665

666

667 **Figure 1.** Study sites along two latitudinal gradients in temperate forests and in the South American  
668 Atlantic Forest (A), and frequency distributions of mean annual temperature in the regions (B).

669 **Figure 2.** The morphological distribution on one size and one shape principal component axis for  
670 tropical (light gray dots) and temperate-zone forest (black dots) ants morphospace (N= 599).

671 **Figure 3.** Four measures of distance between species (multiple-axis metrics) in the morphospace  
672 plotted as functions of the number of species in the ant assemblages in the temperate and tropical  
673 regions: (a) Morphological Diversity (FD), (b) convex hull volume (CHV), (c) mean morphological  
674 distance (MPD), and (d) mean nearest morphological distance (MNND). Each metrics was calculated  
675 using species scores on the first three principal component axes, derived from constrained species pools  
676 for each region separately; each species is a composite of fourteen traits.

677 **Figure 4.** Four measures of distance between species (single-axis metrics) in the morphospace plotted  
678 as functions of the number of species in the ant assemblages in the temperate and tropical regions. (a)  
679 Variance, (b) Range, (c) standard deviation of MNND (SD of MNND), and (d) Functional Diversity  
680 (FD). Each metrics was calculated using PC 1 axis, derived from constrained species pools for each  
681 region separately; each species is a composite of fourteen traits.

682 **Figure 5.** Frequency distributions of trait means at assemblage scale in the temperate and tropical  
683 regions.

684

685

Fig. 1

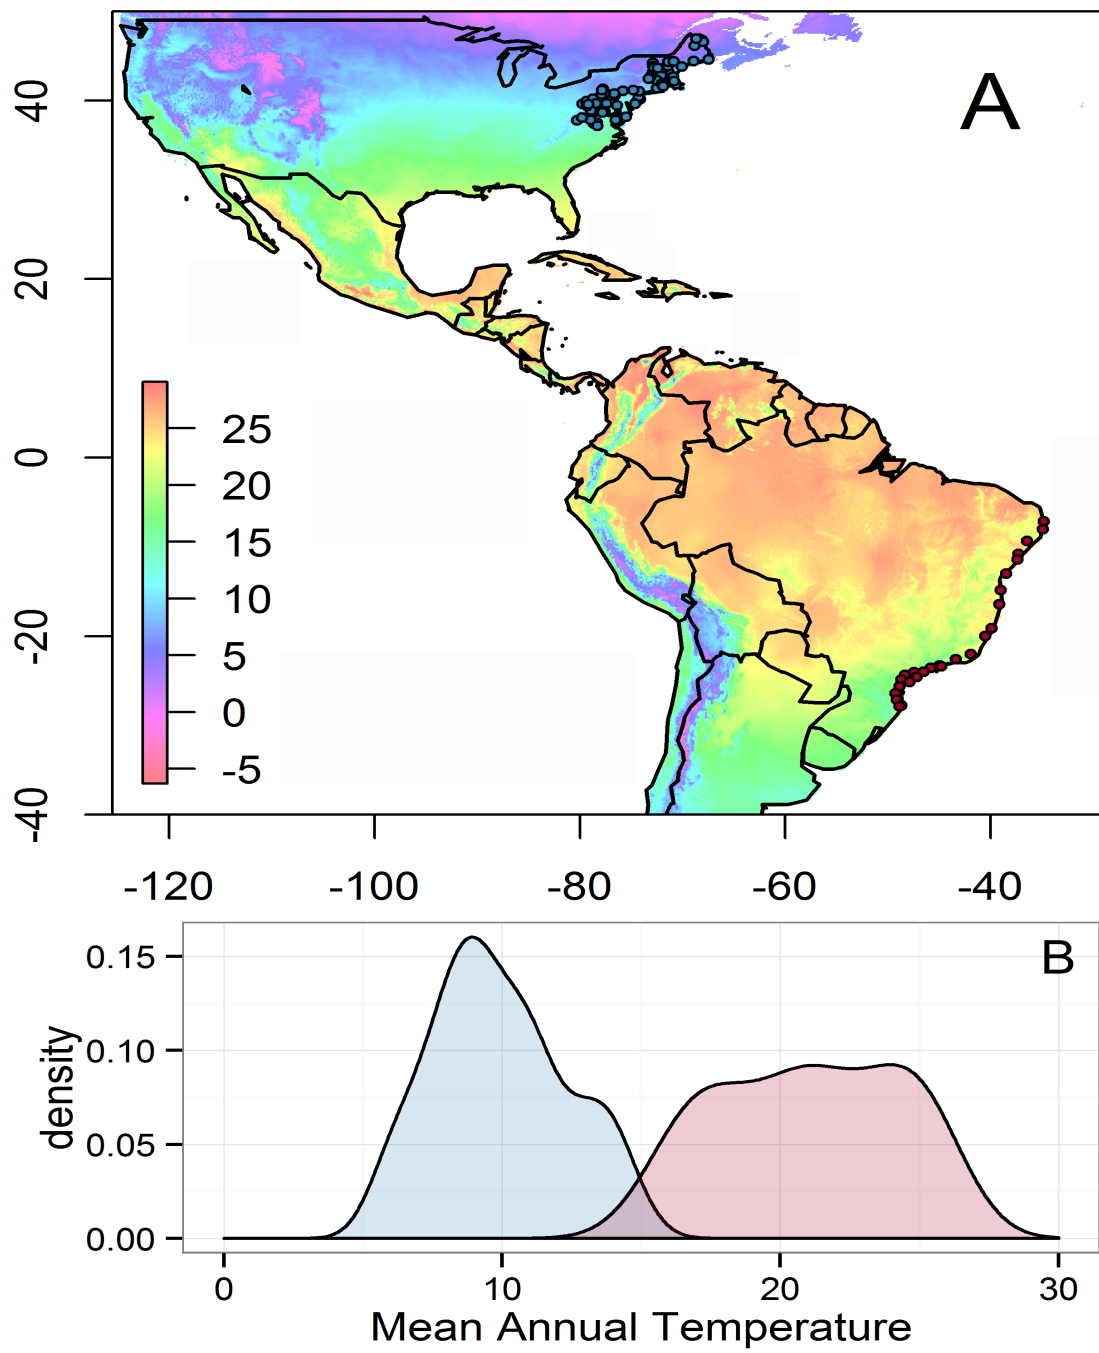



Fig. 2

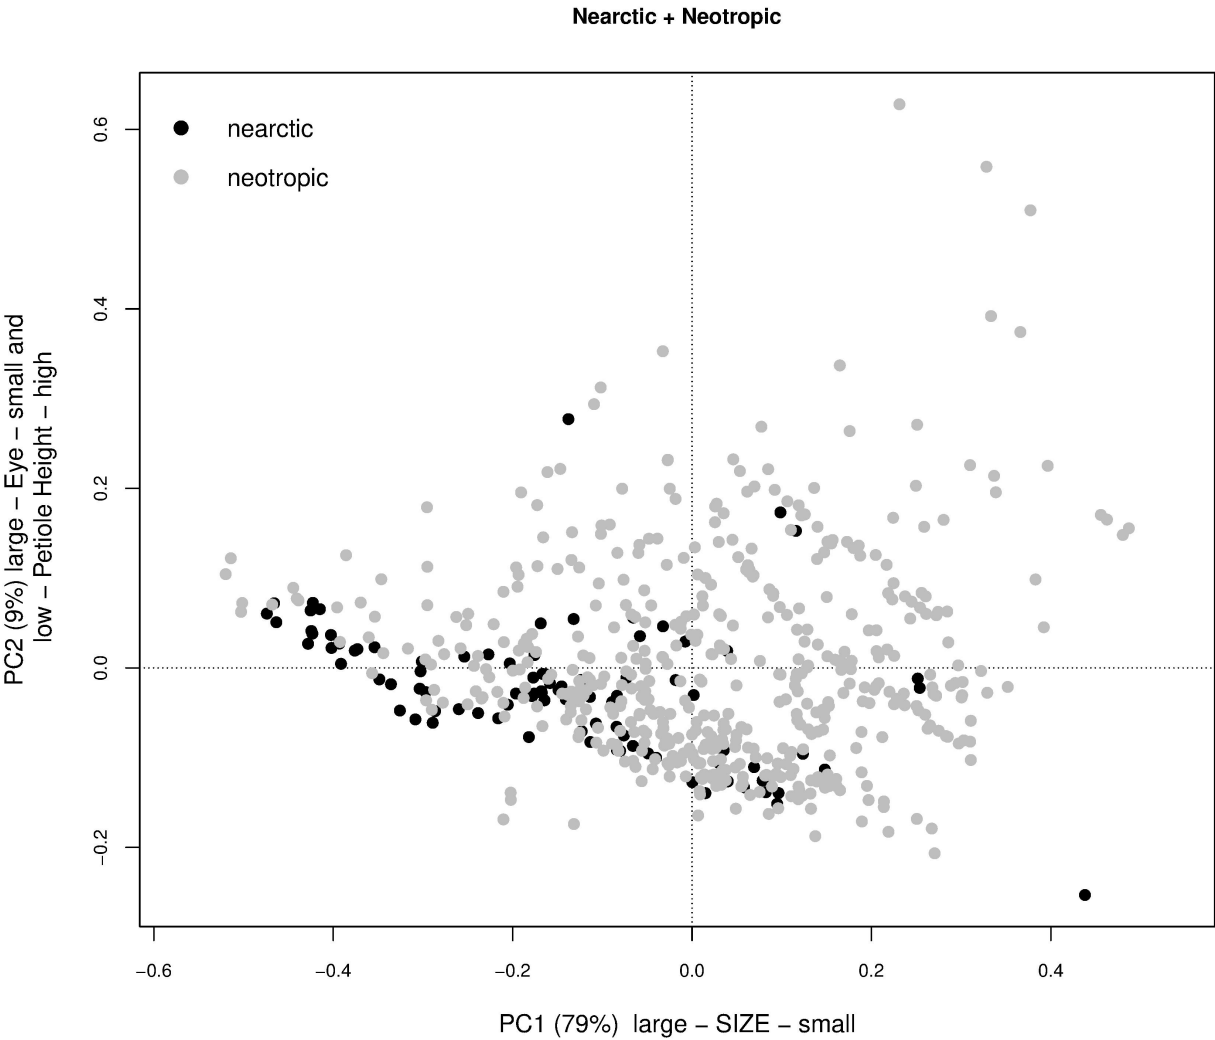

Fig. 3

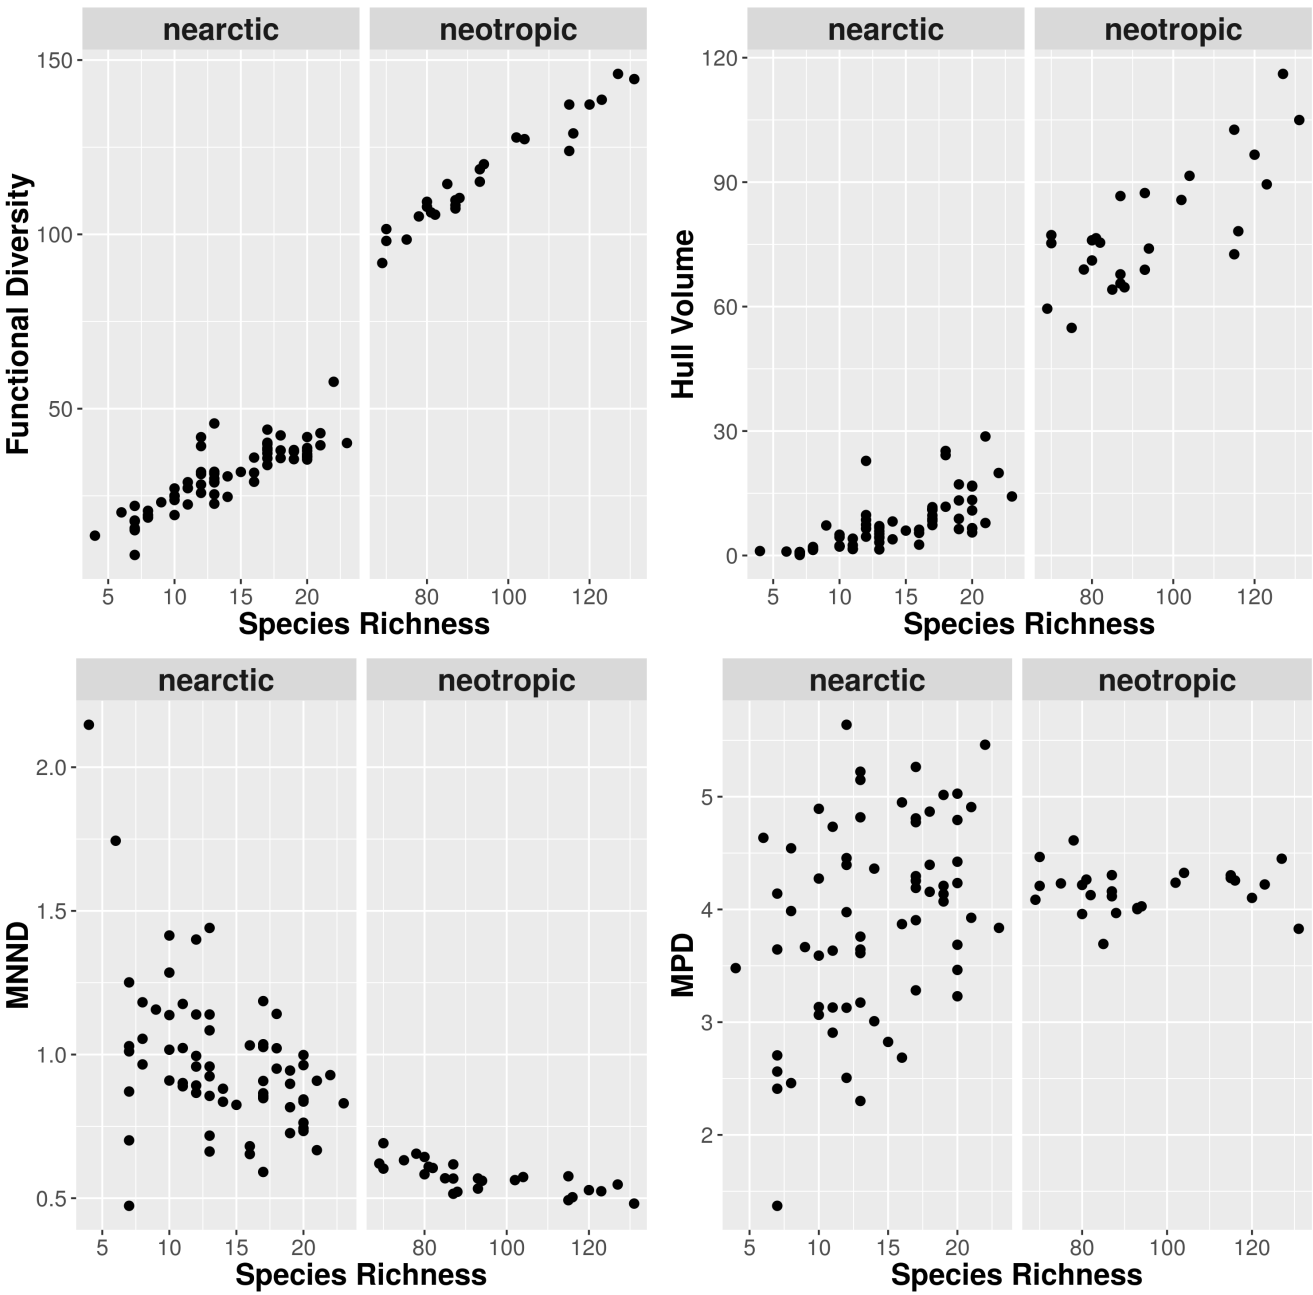

Fig. 4

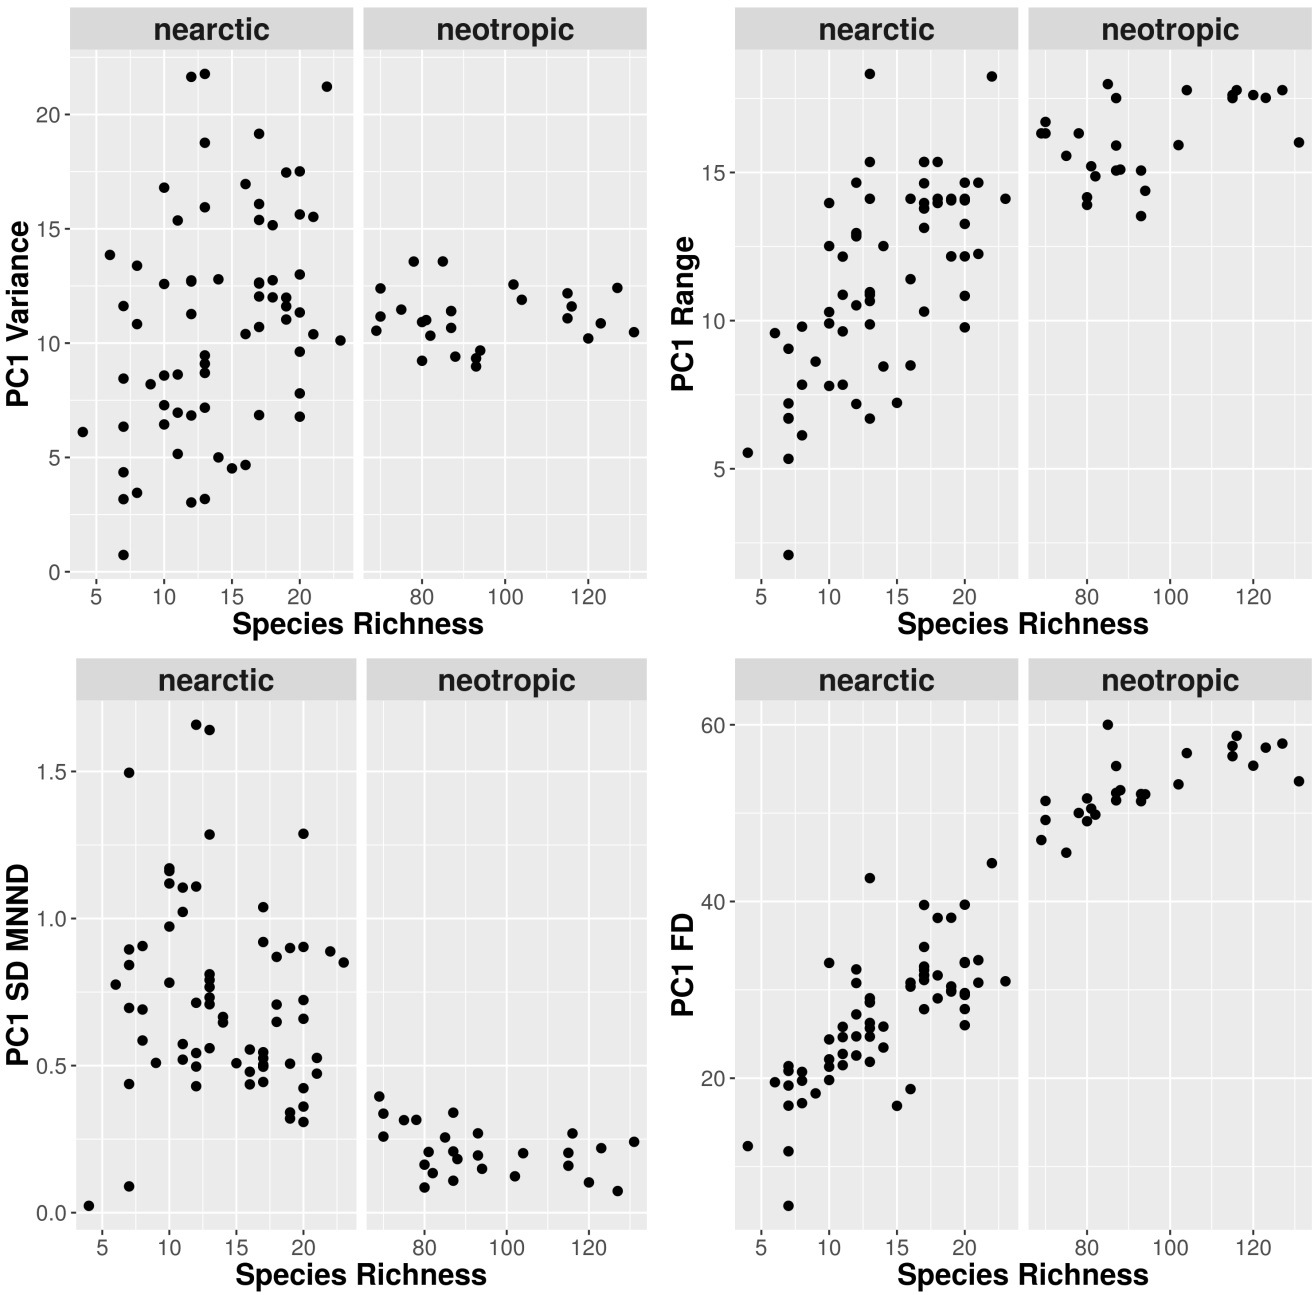

Fig. 5

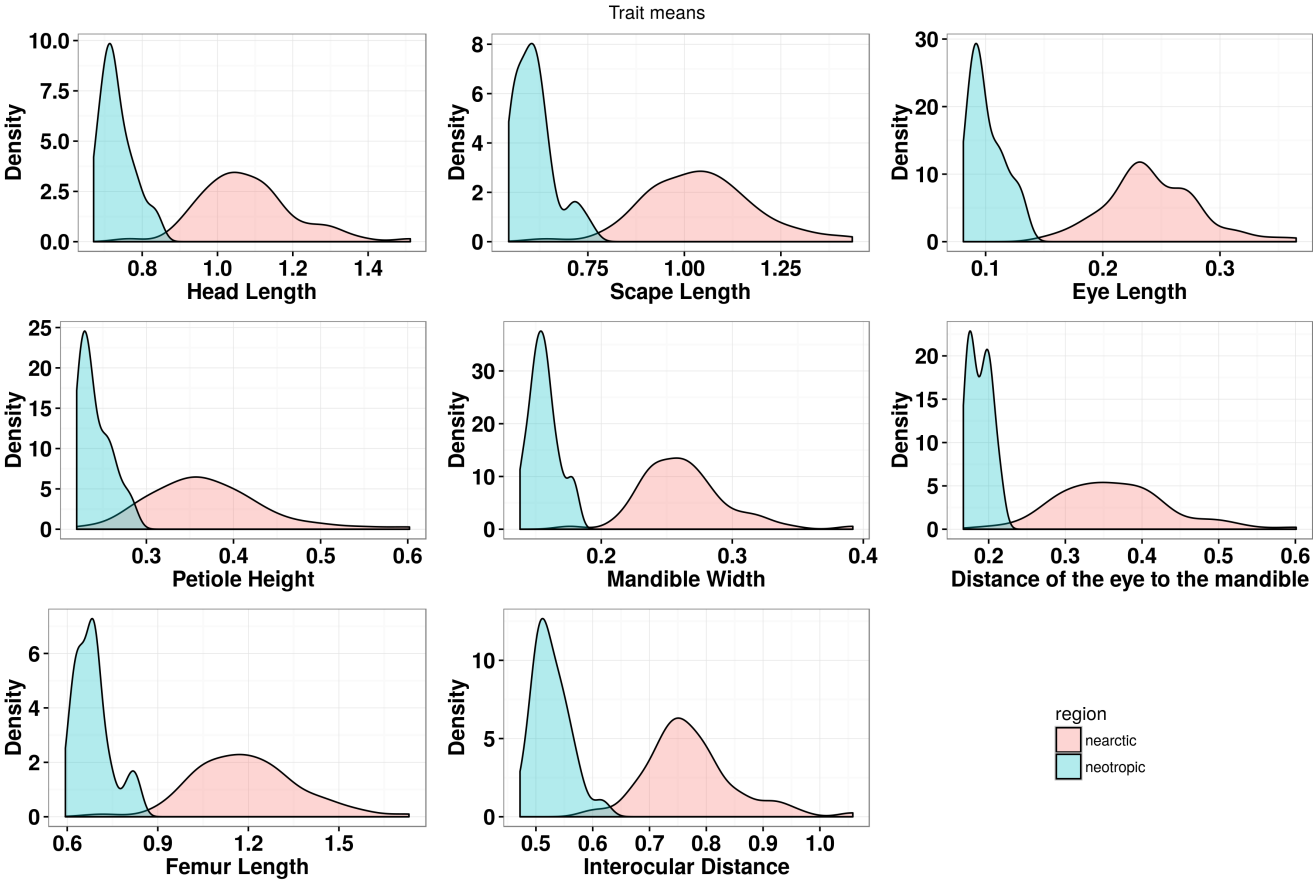

Source: http://www.biorxiv.org/content/10.1101/065417v1.full.pdf
